# Supplementary material for: Destabilizing an interacting motif strengthens the association of a designed ankyrin repeat protein with tubulin
Source: PubMed Central journal article supplement (PMC4933879; doi:10.1038/srep28922), 2016-07-06
Supplement: srep28922-s1.pdf [file srep28922-s1.pdf]

## **Destabilizing an interacting motif strengthens the association of a designed ankyrin repeat protein with tubulin**

Shoeb Ahmad<sup>1</sup>, Ludovic Pecqueur<sup>1,4</sup>, Birgit Dreier<sup>2</sup>, Djemel Hamdane<sup>3</sup>, Magali Aumont-Nicaise<sup>1</sup>,  
Andreas Plückthun<sup>2,\*</sup>, Marcel Knossow<sup>1,\*</sup> and Benoît Gigant<sup>1,\*</sup>

<sup>1</sup>Institute for Integrative Biology of the Cell (I2BC), CEA, CNRS, Univ Paris-Sud, Université Paris-Saclay, 91198, Gif-sur-Yvette cedex, France

<sup>2</sup>Department of Biochemistry, University of Zurich, Winterthurerstrasse 190, CH-8057, Zurich, Switzerland

<sup>3</sup>Laboratoire de Chimie des Processus Biologiques, CNRS-UMR 8229, Collège De France, 11 place Marcelin Berthelot, 75231 Paris Cedex 05, France

<sup>4</sup> Present address: Laboratoire de Chimie des Processus Biologiques, CNRS-UMR 8229, Collège De France, 11 place Marcelin Berthelot, 75231 Paris Cedex 05, France

\*Correspondence should be addressed to A.P. ([plueckthun@bioc.uzh.ch](mailto:plueckthun@bioc.uzh.ch)) or M.K.

([marcel.knossow@i2bc.paris-saclay.fr](mailto:marcel.knossow@i2bc.paris-saclay.fr)) or B.G. ([benoit.gigant@i2bc.paris-saclay.fr](mailto:benoit.gigant@i2bc.paris-saclay.fr))

### **Supporting Information**

**Supplementary Table 1**

**Supplementary Figures 1 to 6**

**Supplementary Table 1. Data collection and refinement statistics for D1, TM-3 and tubulin–A-C2 complex structures.**

|                                                     | D1                               | TM-3                         | Tubulin–A-C2                  |
|-----------------------------------------------------|----------------------------------|------------------------------|-------------------------------|
| <b>Data collection*</b>                             |                                  |                              |                               |
| Space group                                         | P4 <sub>1</sub> 2 <sub>1</sub> 2 | H32                          | P2 <sub>1</sub>               |
| Cell dimensions                                     |                                  |                              |                               |
| <i>a</i> , <i>b</i> , <i>c</i> (Å)                  | 43.4, 43.4, 143.1                | 105.3, 105.3, 193.0          | 87.6, 71.8, 93.0              |
| $\alpha$ , $\beta$ , $\gamma$ (°)                   | 90.0, 90.0, 90.0                 | 90.0, 90.0, 120.0            | 90.0, 99.85, 90.0             |
| Resolution (Å)                                      | 41.53 - 1.16<br>(1.23 - 1.16)    | 52.7 - 2.41<br>(2.50 - 2.41) | 49.74 - 1.90<br>(1.95 - 1.90) |
| <i>R</i> <sub>meas</sub>                            | 0.063 (0.377)                    | 0.145 (1.36)                 | 0.106 (2.002)                 |
| <i>I</i> / $\sigma$ <i>I</i>                        | 14.17 (2.96)                     | 10.4 (1.6)                   | 11.85 (1.01)                  |
| CC <sub>1/2</sub>                                   | 99.8 (87.5)                      | 99.8 (55.5)                  | 99.8 (36.0)                   |
| Completeness (%)                                    | 99.5 (97.7)                      | 99.4 (96.0)                  | 100.0 (100.0)                 |
| Multiplicity                                        | 5.1 (3.8)                        | 6.7 (6.4)                    | 9.0 (9.0)                     |
| <b>Refinement</b>                                   |                                  |                              |                               |
| Resolution (Å)                                      | 32.1 - 1.16                      | 44.4 - 2.41                  | 49.74 - 1.90                  |
| No. reflections                                     | 48392                            | 16079                        | 89661                         |
| <i>R</i> <sub>work</sub> / <i>R</i> <sub>free</sub> | 0.123 / 0.149                    | 0.174 / 0.219                | 0.173/0.208                   |
| No. atoms                                           |                                  |                              |                               |
| Protein                                             | 1380                             | 2018                         | 7693                          |
| Ligand/ion                                          | 32                               | 29                           | 153                           |
| Water                                               | 167                              | 85                           | 655                           |
| <i>B</i> factors                                    |                                  |                              |                               |
| Protein                                             | 11.5                             | 57.8                         | 48.4                          |
| Ligand/ion                                          | 18.8                             | 90.6                         | 53.4                          |
| Waters                                              | 24.9                             | 62.0                         | 55.6                          |
| Coordinate error (Å)                                | 0.12                             | 0.306                        | 0.280                         |
| R.m.s.d.                                            |                                  |                              |                               |
| Bond lengths (Å)                                    | 0.013                            | 0.010                        | 0.010                         |
| Bond angles (°)                                     | 1.24                             | 1.21                         | 1.05                          |
| Ramachandran                                        |                                  |                              |                               |
| Favored region (%)                                  | 98.28                            | 100                          | 97.05                         |
| Allowed region (%)                                  | 1.72                             | 0                            | 2.75                          |
| Outliers (%)                                        | 0                                | 0                            | 0.20                          |

\*Data were collected on a single crystal. Values in parentheses are for the highest-resolution shell.

## Supplementary Figures

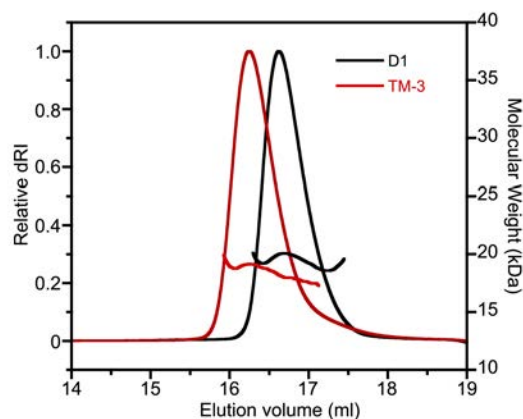

**Supplementary Figure 1. Size exclusion chromatography coupled to multi-angle laser light scattering (SEC-MALLS) analysis of D1 and of TM-3.** The differential refractive index (normalized dRI, left axis) and molecular mass (right axis) are plotted as a function of the column elution volume. The gel filtration step was carried out on a Prominence HPLC system (Shimadzu) using a Superdex 200 Increase 10/300 GL column (GE Healthcare) and with the same buffer as that of the gel filtration experiment of Fig. 6a. Samples of 100  $\mu$ l DARPin at a concentration of 2 mg/ml were run at a 0.5 ml/min flow rate. Detection was performed using a three-detector static light-scattering apparatus (MiniDAWN TREOS, Wyatt Technology, equipped with a quasi-elastic light-scattering module) and a refractometer (Optilab T-rEX, Wyatt Technology). Molecular weight calculations were performed with the ASTRA 6 software (Wyatt Technology) using a  $dn/dc$  value of 0.183 ml/g. The derived masses from the static light-scattering data are  $20.2 \pm 0.7$  kDa (D1) and  $19.6 \pm 0.6$  kDa (TM-3), close to the calculated mass (18.0 kDa) of monomeric DARPins.

| Determined mass (Da) | Matching peptides | Theoretical mass (Da)  | $\Delta$ mass (Da) |
|----------------------|-------------------|------------------------|--------------------|
| 15746                | 11-160<br>1-148   | 15744.808<br>15746.951 | -1.192<br>0.951    |
| 15817                | 1-149             | 15818.030              | 1.030              |

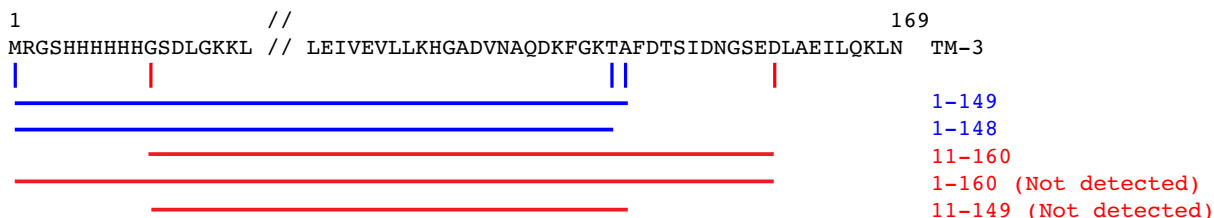

### Supplementary Figure 2. Mass spectrometry analysis of subtilisin-digested TM-3 DARPin.

(Top) Mass of stable fragments of subtilisin-digested TM-3 DARPin as determined by mass spectrometry and boundaries of matching fragments with their theoretical molecular weight. (Bottom) Sequence of TM-3 and putative cleavage sites (see Fig. 3a for a complete TM-3 sequence). Given that the higher determined mass corresponds to that of the 1-149 fragment, the ambiguity on the nature of the fragment of mass 15746 Da is resolved since the 1-160 and 11-149 fragments were not detected by mass spectroscopy. Therefore the TM-3 positions 11 and 160 are not preferential subtilisin-cleavage sites, hence the lower determined mass corresponds to that of the 1-148 fragment.

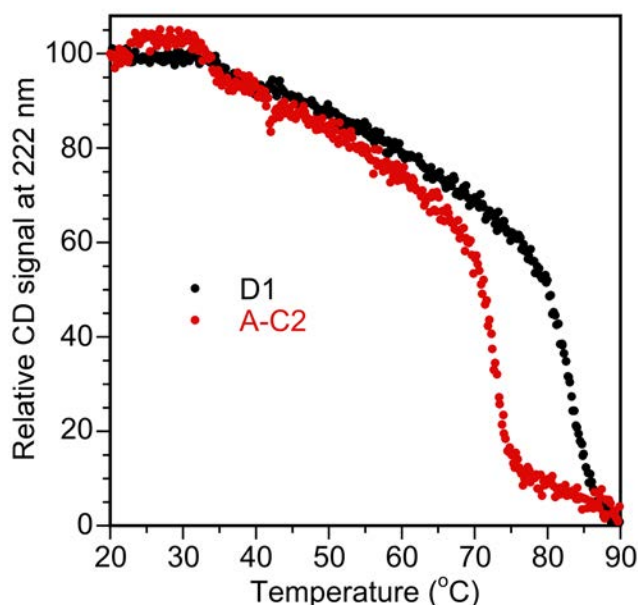

**Supplementary Figure 3. Thermal unfolding profile of D1 and A-C2 DARPins recorded by circular dichroism (CD).** The apparent melting temperatures of D1 and A-C2 were estimated to be 82.8 and 72.2 °C, respectively.

**a**

D1 MRGSHHHHHHGS DLGKKLLEAARAGQDDEV RILMANGADV NATDASGLTPLHLAATYGH L 60  
A-A8 MRGSHHHHHHGS DLGKR LLEAARAGQDDEV RILMANGADV NATDASGLTPLHLAATYGH L 60  
A-A9 MRGSHHHHHHGS DLGR K LLEAARAGQDDEV RILMANGADV NATDASGLTPLHLAATYGH L 60  
A-A10 MRGSHHHHHHGS NLGKKLLEAARAGQDDEV RILMANGADV NATDASGLTPLHLAATYGH L 60  
A-A12 MRGSHHHHHHGS DLGKKLLEAARAGQDDEV RILMANGADV NATDASGLTPLHLAATYGH L 60  
A-C1 MRGSHHHHHHGS DLGKKLLEAARAGQDDEV RILMATG ADVNATDASGLTPLHLAATYGH L 60  
A-E1 MRGSHHHHHHGS DLGKKLLEAARAGQDDEV R TLMANGADV NATDASGLTPLHLAATYGH L 60  
A-G8 MRGSHHHHHHGS DLGKKLLEAARAGQDDEV RILMANGADV NATDASGLTPLHLAATYGH L 60  
A-G10 MRGSHHHHHHGS DLGKKLLEAARAGQDDEV RILMANGADV NATDASGLA PLHLAATYGH L 60  
B-A12 MRGSHHHHHHGS DLGKKLLEAARAGQDDEV RILMANGADV NATDASGLTPLHLAATYGH L 60  
B-D5 MRGSHHHHHHGS DLGKR LLEAARAGQDDEV RILMANGADV NATDASGLTPLHLAATYGH L 60  
B-G4 MRGSHHHHHHGS DLGKKLLEAARAGQ GDEV RILVANGADV NATDASGLTPLHLAATYGH L 60  
B-G8 MRGSHHHHHHGS DLGKKLLEAARAGQDDEV RILMANGADV NATDASGLTPLHLAATYGH L 60

D1 EIVEVLLKHGADVNAI DIMGSTPLHLAALIGHLEI EIVEVLLKHGADVNAVDTWGD TPLHLA 120  
A-A8 EIVEVLLKHGADVNAI DIMGSTPLHLAALV GHLEI EIVEVLLKHGADVNAVDTWGD TPLHLA 120  
A-A9 EIVEVLLKHGADVNAI DIMGSTPLHLAALIGHLEI EIVEVLLMHGADVNAVDTWGD TPLHLA 120  
A-A10 EIVEALLKHGADVNAI DIVGSTPLHLAALIGHLEI EIVEVLLKHGADV SAVDTWGD TPLHLA 120  
A-A12 EIVEVLLKHGADVNAI DI T GSTPLHLAALIGHLEI I EIVEVLLKHGADVNAVDTWGD TPLHLA 120  
A-C1 EIVGVLLKHGADVNAI DIVGSTPLHLAALIGHL G I EIVEVLLKHGADVNAVDTWGD TPLHLA 120  
A-E1 EIVEVLLRHGADVNAI DIVGSTPLHLAALV GHLEI EIVEVLLKHGADVNAVDTWGD TPLHLA 120  
A-G8 EIVEVLLKHGADGN AI DIMGSTPLHLAALIGHLEI EIVEVLLKHGADVNAVDTWGD TPLHLA 120  
A-G10 EIVEALLKHGADVNAI DI T GSTPLHLAALIGHPEI EIVEVLLKHGADVNAVDTWGD TPLHLA 120  
B-A12 EIVEVLLKHGADVNAI DIMGSTPLHL TAL TGRLEI EIVEVLLKHGADVNAVDTWGD TPLHLA 120  
B-D5 EIVEVLLKHGADVNAI DIMGSTPLHLAALIGHL G I EIVEVLLKHGAGV SAVDTWGD TPLHLA 120  
B-G4 EIVEVLLRHGADVNAI DAMGSTPLHLAALIGHLEI EIVEVLLKHGADVNAVDTWGD TPLHLA 120  
B-G8 EIVEVLLRHGADVNAI DIMGSTPLHLAALIGHLEI EIVEVLLKHGADVNAVDTWGD TSLHLA 120

D1 AIMGHLEI EIVEVLLKHGADVNA QDKFGKTAFDI SIDNGNEDLAEILQKLN 169  
A-A8 AIMGHLEI EIVEVLLKH SADVNA QDKFGKTAFDI SIDNGNEDLAEILQKLN 169  
A-A9 AIMGHLEI EIVEVLLKHGADVNA QDKFGKTA SDI SIDNG DEDLAEILQKLN 169  
A-A10 AIMGHLEI EIVEVLL RHGADVNA QDRFGKTAFDI SIDNGNEDLAEILQKLN 169  
A-A12 AIMGHLEI EIVEVLLKHGADVNA QDKFGKTAFDI SIDNGNEDLAEILQKLN 169  
A-C1 AIMGHLE VVEVLLKHGAD ANA QDKFGKTAFDI SIDNGNEDLAEILQKLN 169  
A-E1 AIMGHLEI EIVEVLL RHGADVNA QDKFGKTAFDV SIDNGNEDLAEILQKLN 169  
A-G8 AIMGHLEI EIVEVLLKHGADVNT QDKFGKTAFDI SIDNGNEDLAEILQKLN 169  
A-G10 AIMGHLEI EIVEVLLKHGADVNA PDKFGKTAFDI SID SGNEDLAEILQKLN 169  
B-A12 AIMGHLEI EIVEVLLKHGADVNA QDKFGKTAFDI SIDNGNEDLAEILQKLN 169  
B-D5 AIMGHLEI EIVEVLLKHGADVNA QDKFGKTAFDI SIDNGNEDLAEILQKLN 169  
B-G4 AIMGHLEI EIVEVLLKHGADV SAQDRFGKTAFDI SIDNGNEDLAEILQKLN 169  
B-G8 AIMGHLEI EIVEVLLKHGADVNA QDKFGKTA LD I SIDNGNEDLAEILQKLN 169

**Supplementary Figure 4 (continued on next page)**

**b**

```

D1      MRGSHHHHHHGSDDLGGKLLLEAARAGQDDEVRILMANGADVNA TDASGLTPLHLAATYGHL 60
A-B2   MRGSHHHHHHGSDDLGGKLLLEAARAGQDDEVRILMANGADVNA TDASGLTPLHLAATYGHL 60
A-B7   MRGSHHHHHHGSDDLGGKLLLEAARAGQDDEVRILVANGADVNA TDASGLTPLHLAATYGHL 60
A-B12  MRGSHHHHHHGSDDLGGKLLLEAARAGQDDEVRILMANGADV DAFDSTGQ TPLHLAATYGHL 60
A-E12  MRGSHHHHHHGSDDLGGKLLLEAARAGQDDEVRILMANGADVNA TDASGLTPLHLAATYGHL 60
B-B5   MRGSHHHHHHGSDDLGGKLLLEAARAGQDNEVRILMANGADVNA TDASGLTPLHLAATYGHL 60
B-B7   MRGSHHHHHHGSDDLGGKLLLEAARAGQDDEVRILMANGADVNA TDASGLTPLHLAATYGHL 60

D1      EIVEVLLKKGADVNAIDIMGSTPLHLAALIGHLEIVEVLLKKGADVNAVDTWGDTPHLHLA 120
A-B2   EIVEVLLKKGADVNAIDIMGSTPLHLAALIGHLEIVEVLLKKGADVNAVDTWGDTPHLHLA 120
A-B7   EIVEVLLKKGADVNA TDIMGSTPLHLAALIGHLEIVEVLLKKGADVNAVDTWGDTPHLHLA 120
A-B12  EIVEVLLRHGADVNAIDIMGSTPLHLAALIGHLEIVEVLLKKGAGVNAVDTWGDTPHLHLA 120
A-E12  EIVEVLLKKGADVNAIDIMGSTPLHLAALIGHLEIVEVLLKKGADVNAVDTWGDTPHLHLA 120
B-B5   GIVEVLLKKGADVNAIDIMGSTPLHLAALIGHLEIVEVLLKKGADVNAVDTWSDTPHLHLA 120
B-B7   GIVEVLLKKGADVNAIDIMGSTPLHLAALIGHLEIVEVLLKKGVDVNAVDTWGDTPHLHLA 120

D1      AIMGHLEIVEVLLKKGADVNAQDKFGKTAFDISIDNGNEDLAEILQKLN 169
A-B2   AIMGHLEIVEVLLKKGAGVNAQDKLGKTAFDVAIDNGNEDLAEILQKLN 169
A-B7   AIMGHPEIVEVLPKHGADVNAQDKLGRTAFDVSDIDNGNEDLAEILQKLN 169
A-B12  AIMGHLEIVEVLLKKGADVNTQDKFGKTAFDISIDNGNEDLAEILQKLN 169
A-E12  AIMGHLEIVEALLKYGADVNAQDKFGKTAALDILIDNGNEDLAEILQKLN 169
B-B5   AIMGHPEIVEVLLKKGADVNTQDKFGKTAFDISIDNGNEDLAEILQKLN 169
B-B7   AIMGHPEVVEVLLRHDADVNAQDKFGKTAFDISIDNGNEDQAEILQKLN 169

```

**c**

```

D1      MRGSHHHHHHGSDDLGGKLLLEAARAGQDDEVRILMANGADVNA TDASGLTPLHLAATYGHL 60
A-C2   MRGSHHHHHHGSDDLGGKLLLEAARAGQDDEVRVLMANGADVNA TDASGLTPLHLAATYGHL 60
A-G2   MRGSHHHHHHGSDDLGGKLLLEAARAGQDGEVRILIANGADVNA TDASGLTPLHLAATYGHL 60
B-A10  MRGSHHHHHHGSDDLGGKLLLEAARAGQDDEVRILMANGADVNA TDASGLTPLHLAATYGHL 60
B-D3   MRGSHHHHHHGSDDLGGKLLLE TARAGQDDEVRVLVANGADVNA TDASGLTPLHLAATYGHL 60
B-D6   MRGSHHHHHHGSDDL SKKLLLEAARAGQDDEVRILMANGADVNA TDASGLTPLHLAATYGHL 60

D1      EIVEVLLKKGADVNAIDIMGSTPLHLAALIGHLEIVEVLLKKGADVNAVDTWGDTPHLHLA 120
A-C2   EIVEVLLKKGADV SASDLIMGSTPLHLAALIGHLEIVEVLLKKGADVNAVDTWGDTPHLHLA 120
A-G2   EVVEVLLKKGADVNAIDIMGSTPLHLAALIGHLEIVEVLLKKGADV SAVDTWGDTPHLHLA 120
B-A10  EIVEVLLKKGADVNAIDIMGSTPLHLAALIGHLEIVEVLLKKGADVNAVDTWGDTPHLHLA 120
B-D3   GIIEVLLKKGADVNAIDIMGSTPLHLAAL TGRLEIVEVLLKKGADVNAVDTWGDTPHLHLA 120
B-D6   GIVEVLLQHGADVNTIDIMGSTPLHLAALIGHLEIVEVLLKKGAD INAVDTWGDTPHLHLA 120

D1      AIMGHLEIVEVLLKKGADVNAQDKFGKTAFDISIDNGNEDLAEILQKLN 169
A-C2   AVMGHLKIVEALLKKGADVNAQDKFGKTA YDTSIDNGS EDLAEILQKLN 169
A-G2   AIMGHLEIVEVLLKKGADVNAQDKFGKTAFDI PTDNNGNEDLAEILQKLN 169
B-A10  AIMGHLEIVEVLLKKGAGVNAQDKFGKTAFDI TSDIDNGNEDLAEILQKLN 169
B-D3   AIMGHLEIVEVLLKKGADV SAQNQFGKTAFDISIDNGNEDLAEILQKLN 169
B-D6   AIMGHLEVVGVLLKKGADV SAQDKFGKTAFGTSDIDNGNEDLAEILQKLN 169

```

**Supplementary Figure 4. Multiple sequence alignments of low- (panel a), medium- (b) and high-affinity (c) mutants, colored by repeats as in Fig. 3a. In the case of the medium-affinity mutants, several mutations are clustered in the last internal repeat and in the C-cap (framed). In the case of the high-affinity mutants, the positions 118 and 152 are framed in red. The optimized TM-3 variant has mutated residues at these two positions (Fig. 3a). Two other regions gathering several mutations, in the last internal repeat and in the C-cap, are also framed (in black).**

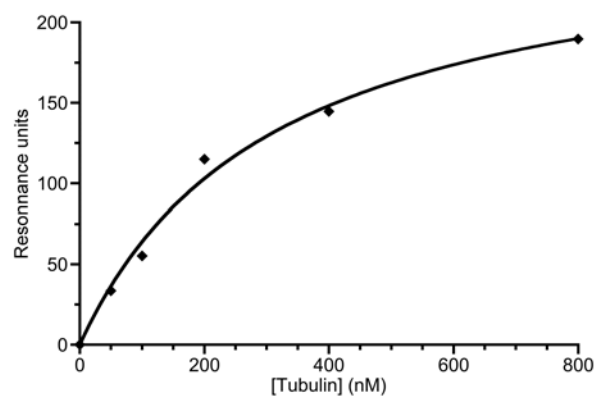

**Supplementary Figure 5. Dissociation constant of the tubulin-D1 complex estimated by SPR.** The resonance unit value at the plateau is plotted as a function of the tubulin concentration injected on a sensor chip with immobilized D1 (data from Fig. 2d, left panel). The data were fitted with the Proteon Manager software and gave a  $K_D$  value of 300 ( $\pm 30$ ) nM.

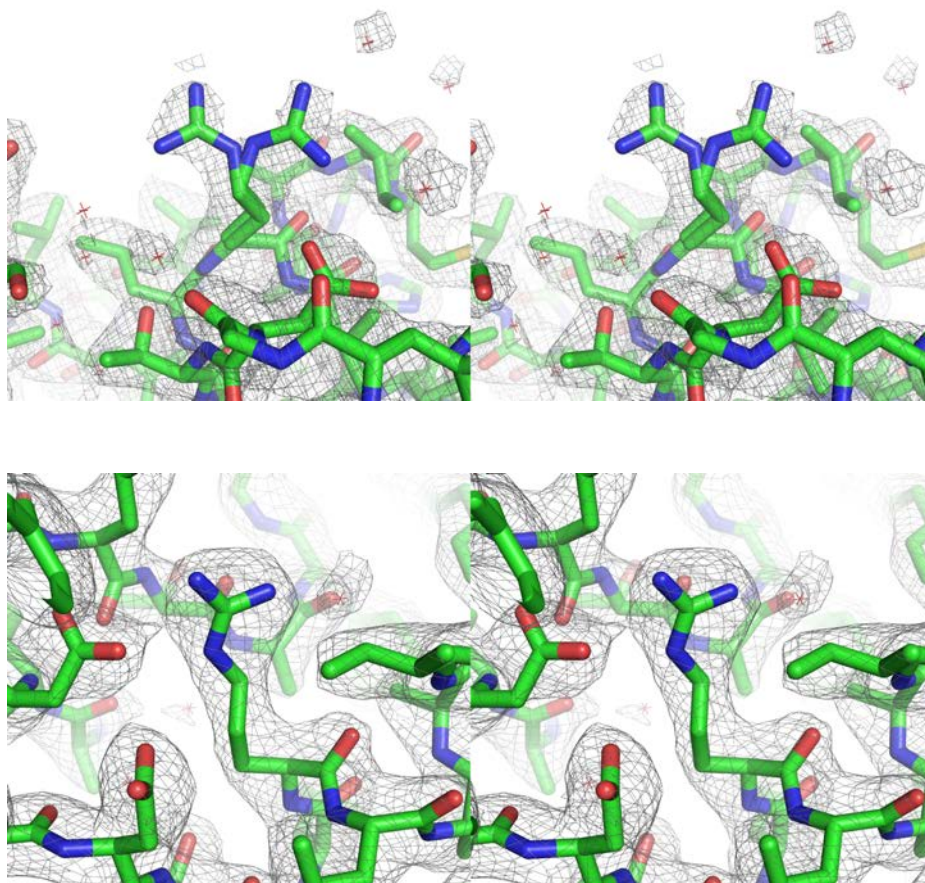

**Supplementary Figure 6. Stereo views of the TM-3  $2F_{obs}-F_{calc}$  electron density map, contoured at the  $1\sigma$  level and centered on Arg118.** Top: molecule A, two alternate conformations of Arg118 have been modeled. Bottom: molecule B, in which Arg118 adopts only one conformation.
